# Supplementary material for: An alternative application of Rasch analysis to assess data from ophthalmic patient-reported outcome instruments
Source: PLoS One. 2018 Jun 21;13(6):e0197503. doi: 10.1371/journal.pone.0197503 (PMC6013148; doi:10.1371/journal.pone.0197503)
Supplement: S2 Dataset — This file contains the questionnaire data collected one year post-operatively. The column names indicate the 9 symptoms corresponding to the items. The rows correspond to the patients. The value 1, 2, 3 and 4 correspond to the severity levels “Not at all”, “A little”, “Quite”, and “Very”, respectively. (XLSX) [file pone.0197503.s002.xlsx]

## Sheet: Sheet1
Glare	Haloes	Starbursts	Hazy vision	Blurred vision	Distortion	Double images	Fluctuation	Depth perception
2	1	1	1	1	1	1	1	1
2	1	1	2	2	1	1	1	1
1	2	1	1	1	1	1	1	1
1	1	1	1	1	1	1	1	1
1	1	1	2	1	1	3	2	1
2	2	2	1	1	1	1	2	2
3	1	3	1	1	1	2	2	1
1	1	1	2	1	1	1	2	1
2	1	2	2	2	1	1	2	1
2	2	2	2	1	1	1	3	1
1	1	1	1	1	1	1	1	1
1	1	1	2	1	1	1	1	1
3	1	3	1	1	1	1	1	1
2	1	2	2	1	1	1	1	1
1	1	1	1	1	1	1	1	1
1	1	1	1	1	1	1	1	1
1	3	4	1	1	1	1	1	1
2	1	2	1	1	1	1	3	1
2	1	1	1	1	1	1	1	1
1	2	1	1	1	1	1	1	1
1	1	1	1	1	1	1	1	1
2	2	1	1	1	1	2	1	1
2	2	1	2	2	1	1	1	1
1	1	1	1	1	2	1	2	1
2	1	1	1	1	1	1	1	1
1	1	4	1	1	1	1	2	1
2	1	1	1	1	1	1	1	1
1	1	1	1	1	1	1	1	1
1	1	2	1	1	1	2	1	1
4	1	4	4	4	1	4	3	1
1	1	1	1	1	1	1	1	1
1	4	2	2	2	1	1	2	1
1	2	2	3	1	1	1	2	1
3	2	1	1	1	1	2	2	2
2	2	2	2	2	1	1	2	1
1	1	1	1	1	1	1	1	1
1	1	1	1	1	1	1	1	1
3	1	3	1	1	1	2	3	2
1	1	1	2	1	1	1	2	1
2	1	2	3	2	1	1	2	1
2	3	1	1	1	1	2	2	2
1	1	1	1	1	1	1	1	1
1	1	2	1	2	1	1	1	1
2	2	2	1	1	1	1	1	1
2	1	2	1	1	1	1	1	1
3	2	3	1	2	1	1	1	1
1	2	1	1	1	1	1	2	1
1	1	1	1	1	1	1	2	1
2	2	1	1	1	1	1	2	1
2	1	1	1	1	1	1	2	1
1	1	1	1	1	1	1	1	1
1	1	1	1	1	1	1	2	2
1	1	1	1	1	1	1	4	1
1	1	1	1	1	1	1	1	1
2	2	1	2	1	1	1	1	1
2	1	2	2	1	1	1	2	1
1	2	3	1	1	1	1	1	1
2	2	1	3	1	1	3	2	2
1	1	2	1	1	1	1	2	1
1	1	1	1	1	1	1	2	1
1	1	1	1	1	1	1	1	1
2	2	1	1	1	1	1	2	1
3	2	2	1	1	1	1	1	2
2	2	2	4	2	1	2	1	1
1	2	2	1	1	1	1	2	1
1	1	1	1	1	1	1	1	1
1	1	1	1	2	1	1	2	1
1	1	2	1	1	1	1	1	1
1	2	1	1	1	1	1	2	1
1	1	2	2	2	1	1	1	1
1	1	1	1	1	1	1	1	1
1	1	1	1	1	1	1	1	1
1	1	1	1	1	1	1	1	1
1	2	1	1	1	1	1	1	1
4	3	3	1	1	1	1	2	1
1	1	2	1	1	1	1	1	1
2	1	1	2	1	1	1	1	1
1	1	1	1	1	1	1	1	1
1	1	2	1	1	1	1	1	1
1	1	3	1	1	1	1	1	1
4	4	4	1	1	1	1	1	1
1	2	1	1	1	1	1	1	1
2	1	1	1	1	1	1	1	1
2	2	3	2	1	1	1	2	1
1	1	1	1	1	1	1	1	1
1	1	2	2	1	1	1	2	1
1	1	1	1	1	1	1	1	1
1	1	1	1	1	1	1	1	1
2	2	2	2	2	1	1	2	1
1	1	1	1	1	1	1	1	1
1	2	2	1	1	1	1	1	2
1	2	1	1	1	1	1	1	1
2	3	1	1	3	1	1	2	1
1	1	1	1	1	1	1	1	1
2	2	1	1	2	1	3	2	1
4	1	2	1	1	1	1	2	1
1	1	1	1	1	1	1	1	1
2	1	1	1	1	1	1	2	1
2	1	2	2	2	1	2	3	1
1	1	1	1	1	1	1	1	1
1	1	1	1	1	1	1	1	1
3	1	3	1	1	1	1	1	1
1	2	1	1	1	1	1	1	1
1	1	1	1	1	1	1	1	1
3	2	1	3	1	1	2	3	1
1	1	2	2	2	1	2	2	1
2	2	2	1	1	1	1	1	1
2	1	1	2	2	1	1	2	1
1	1	1	1	1	1	1	1	1
1	1	1	1	1	1	1	1	1
4	4	4	1	1	1	1	1	1
1	1	1	1	1	1	1	1	1
2	2	1	2	2	2	2	2	1
1	2	2	1	2	1	2	1	1
1	1	1	1	1	1	1	1	1
1	1	1	2	2	1	1	3	1
4	1	4	1	1	1	1	4	4
3	1	3	1	1	1	1	1	1
1	1	1	1	1	1	1	1	1
1	1	2	1	2	1	1	1	1
1	1	4	1	1	1	1	3	1
1	3	3	1	3	1	2	1	2
1	1	2	2	1	1	1	4	1
1	1	1	1	1	1	1	1	1
1	1	1	1	1	1	1	1	1
1	1	1	1	1	1	1	1	1
1	1	1	1	1	1	1	1	1
3	1	3	3	3	1	1	2	2
3	2	2	4	4	1	1	4	1
2	1	2	2	2	1	1	1	1
2	1	1	1	1	1	1	2	1
1	2	2	1	1	1	1	3	1
1	1	1	1	1	1	1	1	1
2	2	1	1	1	1	1	1	1
1	1	1	1	1	1	1	1	1
1	3	3	1	1	1	1	1	1
3	1	1	1	1	1	1	2	3
2	4	1	2	2	1	1	1	1
1	1	1	1	1	1	1	2	1
1	1	1	1	1	1	1	1	1
1	1	1	1	1	1	1	1	1
2	1	2	1	1	1	1	1	1
1	1	1	1	2	1	1	1	1
1	1	1	1	1	1	1	1	1
1	1	1	1	1	1	1	1	1
2	2	1	1	1	1	2	1	1
1	2	4	3	2	1	1	2	1
2	2	2	3	3	1	1	3	2
2	1	2	1	1	1	1	2	1
1	1	1	1	1	1	1	1	1
1	1	1	1	1	1	1	1	1
1	1	1	1	2	1	1	2	2
1	1	1	1	1	1	1	1	1
2	1	2	2	2	1	1	2	1
1	1	3	4	4	1	1	3	2
1	1	1	1	1	1	1	1	1
1	1	1	1	2	1	1	1	1
1	1	4	1	4	1	2	1	1
4	4	4	1	4	1	4	1	1
2	2	2	2	1	1	1	2	2
3	1	1	1	1	1	1	1	4
2	1	1	1	1	1	1	1	1
1	1	2	1	1	1	1	1	1
1	1	1	1	1	1	1	1	1
1	1	1	2	2	1	1	1	1
1	1	1	1	2	1	2	1	1
4	2	1	1	1	1	1	1	1
4	1	4	1	2	1	1	1	1
3	3	3	1	3	1	1	1	1
1	1	1	1	1	1	1	1	1
1	1	1	1	2	1	2	1	1
1	1	1	1	1	1	1	1	1
1	1	2	1	1	1	1	1	1
1	2	2	2	2	1	4	2	1
2	2	2	3	3	1	1	3	1
1	1	1	1	1	1	1	1	1
1	1	1	1	1	1	1	1	1
2	1	1	1	1	1	1	1	1
1	1	2	1	1	1	1	1	1
1	1	1	1	1	1	1	1	1
1	1	1	1	1	1	1	1	1
1	1	1	2	1	1	1	1	1
2	1	1	1	1	1	1	1	1
1	1	1	1	1	1	1	1	1
4	1	2	1	1	1	1	1	1
1	1	1	1	1	1	1	1	1
3	3	1	1	1	1	1	1	1
1	1	1	3	1	1	1	3	1
1	1	1	1	2	1	1	1	1
1	1	1	1	2	1	1	1	1
1	1	1	1	1	1	1	1	1
1	1	1	1	1	1	1	1	1
2	1	2	1	1	1	1	2	2
1	1	2	2	1	1	1	1	1
1	1	1	1	1	1	1	1	1
2	1	1	1	2	1	1	2	1
2	2	1	3	3	4	2	2	1
2	1	1	4	4	1	1	4	1
1	1	1	2	1	1	1	2	1
1	1	1	1	1	1	1	2	1
3	1	3	3	3	1	3	1	1
1	1	1	1	1	1	1	1	1
1	1	1	1	3	1	1	1	1
1	1	1	1	1	1	1	1	1
1	1	2	1	1	1	1	2	1
1	1	1	1	1	1	1	1	2
1	1	1	1	1	1	1	1	1
4	2	3	3	1	1	2	2	1
1	1	1	1	1	1	1	1	1
1	1	1	1	1	1	1	1	1
1	2	1	1	1	1	1	1	1
2	1	1	1	1	1	1	2	1
1	1	1	1	1	1	1	1	1
1	1	1	1	1	1	1	2	1
1	1	1	1	1	1	1	1	1
4	4	1	4	4	1	1	4	3
1	1	1	1	1	1	1	1	1
1	1	1	1	1	1	1	1	1
1	1	1	1	1	1	1	1	1
2	1	2	1	1	1	2	1	1
1	1	1	2	1	1	1	1	1
1	1	1	1	1	1	1	1	1
1	1	1	1	1	1	1	1	1
1	1	1	1	1	1	1	1	1
3	1	3	1	1	1	1	1	1
1	1	1	1	1	1	1	1	1
2	1	2	2	2	1	1	2	1
1	1	1	1	4	1	1	4	1
1	1	1	1	1	1	1	1	1
2	1	2	1	2	1	1	1	1
1	1	1	1	1	1	1	1	1
1	1	1	1	2	1	1	1	1
1	1	1	1	1	1	1	1	1
2	1	1	1	1	1	1	1	1
1	1	1	1	4	1	2	4	1
1	1	1	1	1	1	1	3	1
1	1	1	2	2	1	2	1	1
1	1	4	1	1	1	1	1	1
2	1	2	1	1	1	2	1	1
3	2	2	1	3	1	1	3	2
1	1	1	1	1	1	1	1	1
1	1	1	1	1	1	1	2	1
1	1	1	1	1	1	1	1	1
1	1	1	1	2	1	1	1	1
1	1	1	1	1	1	1	1	1
1	1	1	1	1	1	1	1	1
1	1	1	1	1	1	1	4	1
1	1	1	1	1	1	1	1	1
1	1	1	1	1	1	1	1	1
2	1	2	1	1	1	1	1	1
3	1	3	1	1	1	1	1	1
1	2	1	1	1	1	1	1	1
2	2	2	1	1	1	1	1	1
1	1	1	1	1	1	1	1	1
1	1	1	1	1	1	1	1	1
1	1	1	1	1	1	1	1	1
1	2	1	1	1	1	1	1	1
1	1	1	1	1	1	1	1	1
1	1	1	1	1	1	1	1	1
1	1	1	1	1	1	1	1	1
2	2	2	1	1	1	1	1	1
2	1	1	1	1	1	1	2	1
1	1	1	1	1	1	1	1	1
1	1	1	1	1	1	1	1	1
1	1	1	1	1	1	1	1	1
2	1	1	1	1	1	1	4	1
1	1	1	1	1	1	3	3	1
1	1	1	1	1	1	1	1	1
2	1	2	1	1	1	1	3	1
2	1	2	3	3	1	1	3	1
1	1	1	1	1	1	1	1	1
1	1	1	1	1	1	1	1	1
1	1	1	1	1	1	1	1	1
4	4	4	4	4	1	1	3	1
1	1	1	1	1	1	1	1	1
2	1	1	1	1	1	1	1	1
1	1	1	1	1	1	1	1	1
1	1	1	1	1	1	1	2	1
1	1	1	1	1	1	1	1	1
1	1	1	1	1	1	1	1	1
1	1	1	1	1	1	1	1	1
2	2	2	2	1	1	2	1	1
1	1	1	1	1	1	1	1	1
1	1	1	1	1	1	1	1	1
3	3	1	2	1	1	1	1	1
1	1	1	1	1	1	1	1	1
3	1	1	1	1	1	1	2	1
2	2	1	1	1	1	1	2	1
3	1	3	1	1	1	1	2	1
1	1	1	1	2	1	1	1	1
1	1	1	1	1	1	1	1	1
1	2	1	1	1	1	1	3	1
2	1	1	1	1	1	1	1	1
1	2	2	1	1	1	1	1	1
1	1	1	1	2	1	1	1	1
2	2	2	2	1	1	1	1	1
4	2	2	4	4	1	4	4	1
1	1	1	1	1	1	1	1	1
4	1	3	1	2	3	3	3	1
2	1	1	1	1	1	1	1	1
2	2	2	1	1	1	1	2	1
1	1	2	2	2	1	3	2	1
2	2	2	1	1	1	1	1	1
2	3	2	1	4	1	1	1	2
2	1	1	1	1	1	1	1	1
1	1	1	1	1	1	1	1	1
2	1	1	1	1	1	1	1	1
1	1	1	1	1	1	1	1	1
1	1	1	1	1	1	1	1	1
1	1	1	1	1	1	1	1	1
2	2	2	2	1	1	2	1	2
4	4	2	3	1	1	2	3	4
1	1	3	1	3	1	1	4	1
1	1	1	1	1	1	1	1	1
3	3	1	1	1	1	1	1	1
1	1	1	1	1	1	1	1	1
2	1	1	1	1	1	1	1	1
1	1	1	1	1	1	1	1	1
4	4	4	4	4	1	1	4	1
1	2	3	1	2	1	1	2	1
3	2	1	1	1	1	1	2	1
1	1	1	1	1	1	1	1	1
2	3	3	1	2	1	3	2	2
2	2	1	3	2	1	1	1	1
1	1	1	1	1	1	1	1	1
1	1	1	3	2	1	1	2	1
2	1	1	1	1	1	1	1	3
1	1	1	1	1	1	1	2	1
1	1	1	1	1	1	1	1	1
1	1	1	1	1	1	1	1	1
3	4	4	1	1	1	1	1	1
2	2	1	2	1	1	1	1	1
1	1	1	1	1	1	1	1	1
1	1	1	1	1	1	1	1	1
1	1	1	1	1	1	1	1	1
2	1	1	1	1	1	1	2	1
1	1	1	1	1	1	1	1	1
1	3	3	1	1	1	1	1	1
1	1	1	1	1	1	1	1	1
2	2	1	1	1	1	4	1	1
1	1	2	1	1	1	1	2	1
1	1	1	1	1	1	1	1	1
1	1	2	1	1	1	1	1	1
2	2	2	1	1	1	1	1	1
2	2	2	3	1	1	1	3	1
1	1	1	1	1	1	1	1	1
1	1	1	2	1	1	1	1	1
1	2	2	1	1	1	1	1	1
1	1	1	1	2	1	1	1	1
2	1	1	1	1	1	1	2	1
3	2	2	3	2	1	1	3	1
1	1	1	1	1	1	1	1	1
1	1	1	1	1	1	1	2	1
3	1	3	3	3	1	1	3	2
1	2	2	1	1	1	1	2	1
1	1	1	1	1	1	1	1	1
1	1	1	2	2	1	1	1	2
2	1	1	1	1	1	1	1	1
3	1	1	3	3	1	1	3	1
1	1	1	3	3	1	1	3	1
2	1	1	2	2	1	1	2	1
1	1	1	1	1	1	1	1	1
3	3	3	1	1	1	1	3	1
1	1	1	1	1	1	1	1	1
1	1	1	2	2	1	1	2	2
4	3	1	1	1	1	1	2	1
1	1	3	1	1	1	1	1	1
1	2	2	1	1	1	1	1	1
2	2	1	2	1	1	1	1	1
1	1	1	1	1	1	1	1	1
1	1	1	1	1	1	1	3	1
1	1	1	1	1	1	1	2	1
2	1	2	1	1	1	3	1	1
1	1	1	1	1	1	1	1	1
1	1	1	1	1	1	1	1	1
2	1	1	1	1	1	1	1	1
2	1	1	1	1	1	1	1	1
1	1	2	1	1	1	1	1	1
1	1	1	1	1	1	1	1	1
3	3	1	1	1	1	1	2	1
1	1	1	1	1	1	1	1	1
2	2	1	1	3	1	1	2	1
2	1	1	1	1	1	1	1	1
1	1	1	1	1	1	1	1	1
1	1	1	1	1	1	1	1	1
1	2	1	1	1	1	1	1	1
1	1	1	1	1	1	1	1	1
1	1	1	1	1	1	1	1	1
2	1	1	1	1	1	1	2	1
2	2	2	1	1	1	1	1	1
1	1	2	1	1	1	1	2	1
1	1	1	1	1	1	1	1	1
1	1	1	1	1	1	1	1	1
1	1	1	2	2	1	1	2	1
2	2	2	1	1	1	4	1	1
1	1	1	1	1	1	1	1	1
2	1	1	1	1	1	1	2	1
3	1	3	2	1	1	1	1	1
1	1	1	4	4	1	2	3	1
1	1	1	1	1	1	1	1	1
4	4	4	3	4	1	1	4	2
4	4	4	4	3	3	3	3	3
1	1	1	2	2	1	1	2	1
1	1	1	1	1	1	1	1	1
1	1	1	1	1	1	2	1	1
1	1	1	2	3	1	1	1	1
2	2	1	1	2	1	2	2	1
2	1	2	3	3	2	1	2	3
2	2	2	2	2	1	1	1	1
1	1	1	1	1	1	1	1	1
1	2	2	3	1	1	2	2	3
2	2	2	2	2	1	1	2	1
2	2	2	1	3	2	1	2	1
2	1	2	1	1	1	1	1	1
3	3	3	1	2	1	1	1	2
2	1	2	1	3	1	1	1	1
1	1	1	1	1	1	1	1	1
1	1	2	1	1	1	1	1	1
1	1	1	1	1	1	1	1	1
1	2	1	1	1	1	1	1	2
1	1	1	1	1	1	2	1	1
3	1	2	1	1	1	1	1	1
2	1	1	1	1	1	1	1	1
4	4	4	1	4	1	1	4	1
1	1	1	1	1	1	1	1	1
1	2	2	1	1	1	1	1	1
1	1	1	1	1	1	1	1	1
4	3	4	3	3	1	1	3	1
2	1	1	1	1	1	1	1	1
1	2	3	1	1	1	1	1	1
2	1	1	1	1	1	4	2	1
1	1	1	1	1	1	1	1	2
1	1	1	1	1	1	1	1	1
1	3	1	1	1	1	1	1	1
2	2	1	1	1	1	1	1	1
1	2	1	1	1	1	1	2	1
2	3	2	1	1	1	2	1	1
2	3	2	1	1	1	1	1	1
2	2	1	1	3	1	1	1	1
1	2	1	1	1	1	1	1	1
1	1	1	1	1	1	1	1	1
2	2	3	2	2	1	1	1	1
1	1	1	1	1	1	1	1	1
2	1	1	1	1	1	1	2	1
1	2	1	4	4	1	1	4	1
3	4	2	1	2	3	2	2	1
2	2	1	1	1	1	1	1	2
1	1	1	1	2	1	1	2	1
1	1	1	1	1	1	1	1	1
2	1	1	1	1	1	1	2	1
2	1	1	1	2	1	1	2	1
2	1	1	1	1	2	1	2	1
1	1	1	1	2	1	1	1	1
1	1	1	2	1	1	1	2	1
1	1	1	2	2	1	1	1	1
2	1	2	1	2	1	1	2	2
2	1	1	2	1	1	1	1	1
2	2	2	1	2	1	1	2	1
1	1	1	1	1	1	1	1	1
2	2	2	1	1	1	1	1	1
1	1	1	1	1	1	1	1	1
2	1	1	1	1	1	1	2	1
1	1	1	1	1	1	1	1	1
4	3	3	2	2	1	1	1	2
2	1	2	1	2	1	1	1	1
2	2	1	1	1	1	1	2	1
1	1	1	1	1	1	3	1	1
1	1	2	1	1	1	1	1	1
2	1	2	2	2	1	1	1	1
1	1	1	1	1	1	1	1	1
1	1	1	1	2	1	1	1	1
1	1	1	1	1	1	1	1	1
1	2	1	1	1	1	1	1	1
2	3	2	1	2	1	1	2	2
