# Supplementary material for: An alternative application of Rasch analysis to assess data from ophthalmic patient-reported outcome instruments
Source: PLoS One. 2018 Jun 21;13(6):e0197503. doi: 10.1371/journal.pone.0197503 (PMC6013148; doi:10.1371/journal.pone.0197503)
Supplement: S2 Script — When running this program, all the files (namely main_script.m, fct_poly_rasch_analysis.p, One_Month_Post_Operative_Data.xlsx, One_Year_Post_Operative_Data.xlsx) should be in current working directory. After execution, following the comments on the top of the file, the program produced the results in Tables 6, 7, Fig 6, Tables 9, 10 and Fig 8 in the manuscript, respectively. (M) [file pone.0197503.s004.m]

clc
clear
close all


%Uncomment this line to get results in Table 7, Table 8 and Figure 5 in the
%manuscript

Data=readtable('One_Month_Post_Operative_Data.xlsx','ReadVariableNames',true);


%Uncomment this line to get results in Table 10, Table 11 and Figure 7 in the
%manuscript
%Data=readtable('One_Year_Post_Operative_Data.xlsx','ReadVariableNames',true);


[PersonParam_Group, ItemParam_Group ] = fct_poly_rasch_analysis(Data);
